# Supplementary material for: Growing three-dimensional objects with light
Source: PubMed Central journal article supplement — Proc Natl Acad Sci U S A. 2024 Jul 1;121(28):e2303648121. doi: 10.1073/pnas.2303648121 (PMC11252790; doi:10.1073/pnas.2303648121), 2024-07-01
Supplement: pnas.2303648121.sapp.pdf [file pnas.2303648121.sapp.pdf]

# PNAS



1

## 2 **Supporting Information for**

### 3 **Growing three dimensional objects with light**

4 **Gabriel Lipkowitz, Max A. Saccone, Matthew A. Panzer, Ian A. Coates, Kaiwen Hsiao, Dan Ilyin,**  
5 **Jason M. Kronenfeld, John R. Tumbleston, Eric S.G. Shaqfeh, and Joseph M. DeSimone**

6 **Joseph M. DeSimone.**

7 **E-mail: [jmdesimone@stanford.edu](mailto:jmdesimone@stanford.edu)**

#### 8 **This PDF file includes:**

9 Fig. S1

10 Legends for Movies S1 to S4

#### 11 **Other supporting materials for this manuscript include the following:**

12 Movies S1 to S4

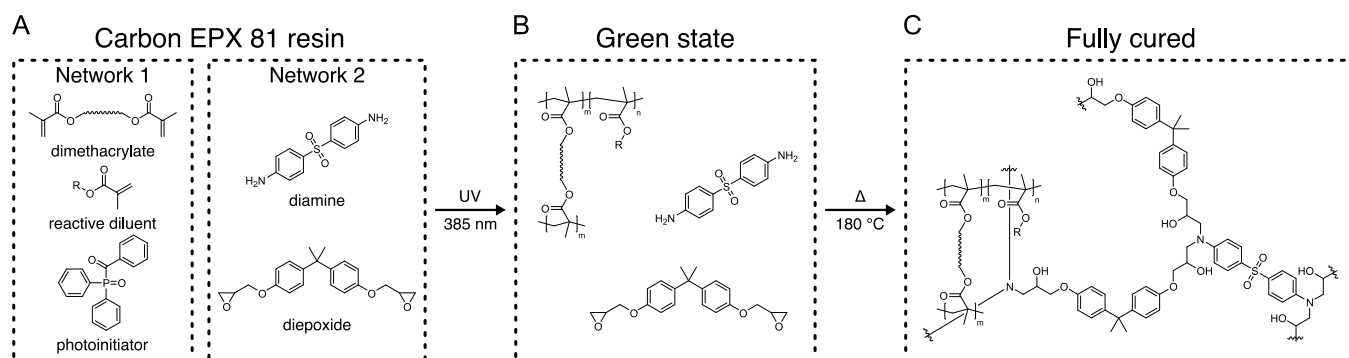

**Fig. S1. EPX 81 resin chemistry.** (A) Carbon EPX 81 resin components, (B) green state after UV curing, in which acrylate groups have undergone free radical polymerization, (C) cured resin after thermal curing in which diamines react with diepoxides.

14 **Supporting Videos**

15 Please refer to the Materials and Methods section for further experimental details.

16

17 **Movie S1. CLIP with a solid window performed in fully continuous mode under varying oxygenation condi-**  
18 **tions.**

19 **Movie S2. CLIP with a solid window performed in stepped mode under varying oxygenation conditions.**

20 **Movie S3. Vat photopolymerization with an immiscible liquid window that is unprocessed.**

21 **Movie S4. Vat photopolymerization with an immiscible liquid window that is deoxygenated.**
